# Supplementary material for: Growth, Chemical Composition, Histology and Antioxidant Genes of Atlantic Salmon (Salmo salar) Fed Whole or Pre-Processed Nannochloropsis oceanica and Tetraselmis sp.
Source: MDPI journal article supplement (doi:10.3390/fishes6030023), 2021-07-23
Supplement: s1 [file s1]

Archive with 2 entries (2 files):
- Solveig et al. Fishes supplementary.pdf
- Supplementary table Solveig et al..xlsx
