# Supplementary material for: Growth, Chemical Composition, Histology and Antioxidant Genes of Atlantic Salmon (Salmo salar) Fed Whole or Pre-Processed Nannochloropsis oceanica and Tetraselmis sp.
Source: MDPI journal article supplement (doi:10.3390/fishes6030023), 2021-07-23
Supplement: s1 [file s1 › Supplementary table Solveig et al..xlsx]

## Sheet: Fish performance
Supplementary Table 1. Results of 2-way ANOVA of fish growth and proximate composition.
Initial weight	F value	Pr(>F)
Alga	3.044	0.107
Process	0.072	0.793
Alga:Process	0	0.994
Final weight	F value	Pr(>F)
Alga	3.64	0.0806
Process	0.735	0.4082
Alga:Process	0.06	0.8108
Weight gain	F value	Pr(>F)
Alga	4.323	0.0597
Process	0.774	0.3963
Alga:Process	0.059	0.8115
Specific growth rate	F value	Pr(>F)
Alga	4.225	0.0623
Process	0.773	0.3965
Alga:Process	0.06	0.8107
Dry matter	F value	Pr(>F)
Alga	0.033	0.85804
Process	1.464	0.24956
Alga:Process	11.217	0.00579
Lipid	F value	Pr(>F)
Alga	0.035	0.855
Process	0.684	0.424
Alga:Process	0.124	0.73
Protein	F value	Pr(>F)
Alga	0.3114	0.586
Process	0.031	0.864
Alga:Process	2.565	0.135
Energy	F value	Pr(>F)
Alga	45.845	1.98x10-5
Process	1.198	0.295
Alga:Process	1.881	0.195
Ash	F value	Pr(>F)
Alga	51.294	1.15x10-5
Process	3.32	0.0935
Alga:Process	2.382	0.1487

## Sheet: Fatty acids
Supplementary Table 2. Results of 2-way ANOVA of fatty acid data from fillets of the algae-fed fish.
c14:0	F value	Pr(>F)
Alga	0.32823	0.57728
Process	0.9821	0.34124
Alga:Process	0.97959	0.34184
c16:0	F value	Pr(>F)
Alga	2.353	0.15095
Process	13.759	0.00298
Alga:Process	0.208	0.65614
NE vs TU		0.0138
NE vs NU		0.052
c18:0	F value	Pr(>F)
Alga	1.965	0.1886
Process	9.789	0.0096
Alga:Process	0.353	0.5642
NE vs TU		0.0313
TE vs TU		0.104
Sum SFA	F value	Pr(>F)
Alga	3.726	0.07755
Process	14.499	0.00249
Alga:Process	0.176	0.68193
NE vs NU		0.0483
NE vs TU		0.00748
TE vs TU		0.131
C16:1	F value	Pr(>F)
Alga	386.78	6.40 x 10-10
Process	56.07	1.22x 10-5
Alga:Process	13.99	0.00326
NE vs TE		1.38x 10-8
NE vs NU		3.17x 10-5
NE vs TU		7.51x 10-9
TE vs NU		7.83x 10-6
NU vs TU		1.53x 10-6
TE vs TU		0.147
C18:1n-9	F value	Pr(>F)
Alga	0.168	0.689268
Process	0.056	0.817213
Alga:Process	20.496	0.000693
NE vs NU		0.0447
TE vs TU		0.0249
NE vs TE		0.0552
C18:1n-7	F value	Pr(>F)
Alga	10.411	0.00806
Process	9.579	0.01019
Alga:Process	13.267	0.00387
NE vs NU		0.00288
TE vs NU		0.00446
NU VS TU		0.00305
C20:1n-9	F value	Pr(>F)
Alga	1.167	0.303078
Process	8.959	0.012229
Alga:Process	22.988	0.000558
NE vs TE		0.0943
NE vs NU		0.000974
TE vs NU		0.0673
NU vs TU		0.00807
C22:1n-9	F value	Pr(>F)
Alga	30.03	0.000192
Process	14.31	0.003031
Alga:Process	40.16	5.54 x 10-5
NE vs NU		0.000103
TE vs NU		0.000196
NU vs TU		2.68e-05
Sum MUFA	F value	Pr(>F)
Alga	12.78	0.00382
Process	0.386	0.54628
Alga:Process	36.145	6.1 x 10-5
NE vs NU		0.00254
TE vs NU		0.0502
TE vs TU		0.0115
NU vs TU		0.0001
C18:2n-6	F value	Pr(>F)
Alga	2.668	0.1283
Process	0.03	0.86608
Alga:Process	9.559	0.00933
NU vs TU		0.0261
NE vs NU		0.151
C18:3n-3	F value	Pr(>F)
Alga	49.236	2.22 x 10-5
Process	0.656	0.4352
Alga:Process	8.825	0.0127
NE vs TE		9.87e-05
NE vs TU		0.0122
TE vs NU		0.00069
TE vs TU		0.0793
C18:4n-3	F value	Pr(>F)
Alga	1071.1	2.59 x 10-12
Process	325.2	1.62 x 10-9
Alga:Process	535.9	1.11 x 10-10
NE vs TE		0
NE vs NU		0.116
NE vs TU		0.000187
TE vs NU		0
TE vs TU		0
NU vs TU		0.00574
C20:4n-3	F value	Pr(>F)
Alga	240.799	8.4 x 10-8
Process	1.171	0.3073
Alga:Process	4.754	0.0571
NE vs TE		2.26e-06
NE vs TU		2.08e-05
TE vs NU		4.25e-06
TE vs TU		0.174
NU vs TU		4.39e-05
C20:5n-3	F value	Pr(>F)
Alga	22.0349	0.0005195
Process	20.9378	0.00063707
Alga:Process	4.5219	0.0548979
C22:5n-3	F value	Pr(>F)
Alga	1.311	0.275
Process	0.795	0.39
Alga:Process	1.155	0.304
C22:6n-3	F value	Pr(>F)
Alga	0.384	0.54697
Process	0.284	0.6036
Alga:Process	9.629	0.00914
TE vs TU		0.0982
NU vs TU		0.0887
Sum PUFA	F value	Pr(>F)
Alga	0.281	0.606
Process	0.279	0.607
Alga:Process	0.02	0.89
Sum n-6	F value	Pr(>F)
Alga	2.668	0.1283
Process	0.03	0.86608
Alga:Process	9.559	0.00933
NE vs NU		0.151
NU vs TU		0.0261
Sum n-3	F value	Pr(>F)
Alga	0.003	0.956
Process	3.023	0.108
Alga:Process	0.046	0.833
EPA + DHA	F value	Pr(>F)
Alga	0.932	0.353
Process	0.405	0.536
Alga:Process	0.022	0.885
Sum n-6/n-3	F value	Pr(>F)
Alga	3.829	0.074
Process	0.456	0.512
Alga:Process	2.157	0.168
NU vs TU		0.125

## Sheet: Histology
Supplementary Table 3. Results of 2-way ANOVA of parameters measured from the mid and distal intestine and liver of Atlantic salmon.
Mid intestine
Height stratum compactum and granulosum	F value	Pr(>F)
Alga	0.619	0.447
Process	0.472	0.505
Alga:Process	3.656	0.08
Villi width	F value	Pr(>F)
Alga	1.008	0.3352
Process	9.075	0.0108
Alga:Process	3.244	0.0968
TE vs TU		0.0234
Mucous cells	F value	Pr(>F)
Alga	0.058	0.813
Process	2.425	0.145
Alga:Process	0.054	0.819
Mucous cell area	F value	Pr(>F)
Alga	0.526	0.482
Process	1.261	0.283
Alga:Process	0.419	0.53
Distal intestine
Height stratum compactum and granulosum	F value	Pr(>F)
Alga	0.005	0.945
Process	0.023	0.883
Alga:Process	0.964	0.346
Villi width	F value	Pr(>F)
Alga	1.25	0.28548
Process	4.033	0.06767
Alga:Process	18.08	0.00112
NE vs TE		0.0118
TE vs TU		0.00396
Mucous cells	F value	Pr(>F)
Alga	0.09	0.77
Process	0.081	0.781
Alga:Process	1.135	0.308
Mucous cell area	F value	Pr(>F)
Alga	0.319	0.583
Process	0.923	0.356
Alga:Process	2.649	0.13
Enterocyte vacuolization	F value	Pr(>F)
Alga	0	1
Process	24	0.000367
Alga:Process	0.667	0.430127
NE vs NU		0.00769
NE vs TU		0.0211
TE vs NU		0.0211
TE vs TU		0.0576
Liver
Vacuolization	F value	Pr(>F)
Alga	0.004	0.948817
Process	17.526	0.000501
Alga:Process	4.588	0.045377
NE vs TU		0.0221
TE vs NU		0.0467
TE vs TU		0.00147

## Sheet: Liver genes
Supplementary Table 4. Results of 2-way ANOVA of gene data from the liver of the algae-fed fish.
gpx	F value	Pr(>F)
Alga	0.141	0.7139
Process	9.953	0.0083
Alga:Process	0.422	0.5282
Tukey's test results
TE vs TU		0.0953
cr3	F value	Pr(>F)
Alga	1.819	0.2023
Process	6.77	0.0231
Alga:Process	1.155	0.3036
Tukey's test results
NE vs TU		0.0675
TE vs TU		0.0936
nrf2	F value	Pr(>F)
Alga	1.859	0.1978
Process	5.345	0.0393
Alga:Process	1.143	0.306
Tukey's test results
TE vs NU		0.0938
sod1	F value	Pr(>F)
Alga	2.24	0.1603
Process	7.7	0.0168
Alga:Process	2.337	0.1523
Tukey's test results
TE vs NU		0.0457
TE vs TU		0.044
cat	F value	Pr(>F)
Alga	2.439	0.1443
Process	7.098	0.0206
Alga:Process	3.363	0.0916
Tukey's test results
TE vs NU		0.0483
TE vs TU		0.0346

## Sheet: Distal intestine genes
Supplementary Table 5. Results of 2-way ANOVA of gene data from the distal intestine of the algae-fed fish.
gpx	F value	Pr(>F)
Alga	1.809	0.204
Process	0.518	0.486
Alga:Process	0.232	0.639
cr3	F value	Pr(>F)
Alga	0.028	0.87
Process	0.305	0.591
Alga:Process	0.179	0.68
sod1	F value	Pr(>F)
Alga	0.158	0.698
Process	2.146	0.169
Alga:Process	1.645	0.224
muc2	F value	Pr(>F)
Alga	0.054	0.82
Process	1.929	0.19
Alga:Process	2.256	0.159
